# Supplementary material for: Viral Genetic Linkage Analysis in the Presence of Missing Data
Source: PubMed Central journal article supplement (PMC4547719; doi:10.1371/journal.pone.0135469), 2015-08-24
Supplement: pone.0135469.s001.pdf [file pone.0135469.s001.pdf]

**S1 Table. Estimated overall proportion of clustering for observed, incomplete-observed and imputed-complete datasets using kernel density estimation for the distribution of minimum distances**

| Approach       | Clus, Obs | Clus, In-Obs | Clus, Impute-Com | Cov, In-Obs | Cov, Impute-Com |
|----------------|-----------|--------------|------------------|-------------|-----------------|
| Ad-hoc         | 0.043     | 0.034        | 0.042            | 56%         | 88%             |
| Kernel density |           | 0.034        | 0.040            | 56%         | 91%             |

Clustering assessed at the 0.10 threshold, with  $m=100$  deletions. Coverage is calculated as described in Table 2. Ratio of male:female deletions was 10:1. *Clus* stands for clustering; *Obs* for observed data; *In-Obs* for ncomplete-observed data; *Impute-Com* for imputed-complete data; *Cov* stands for coverage.
